# Supplementary material
Source: publisher figshare collection journal article supplement (https://gsapubs.figshare.com/articles/dataset/_/20505384)
Supplement: Supplementary file 1 [file 36708516]

## Supplemental Material

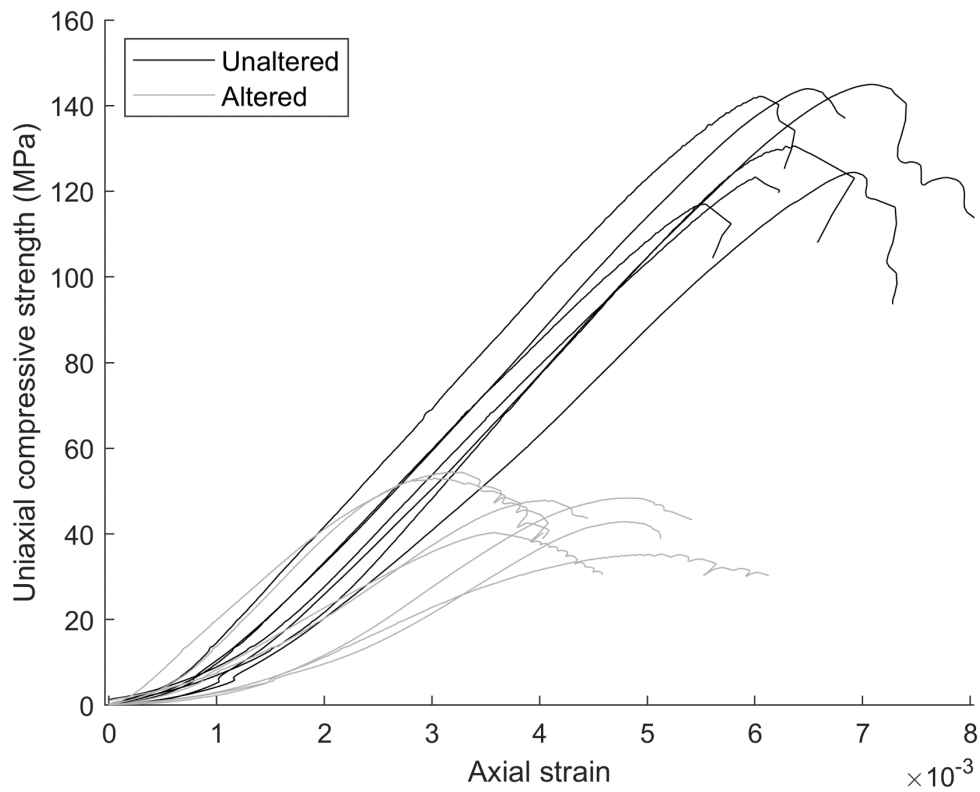

Supplementary Figure 1. Stress-strain curves for the laboratory uniaxial compressive strength (UCS) tests used for calibration in this study. Black shows tests on unaltered rock (Merapi sample M-U) and grey shows tests on altered rock (Merapi sample M-HA1).

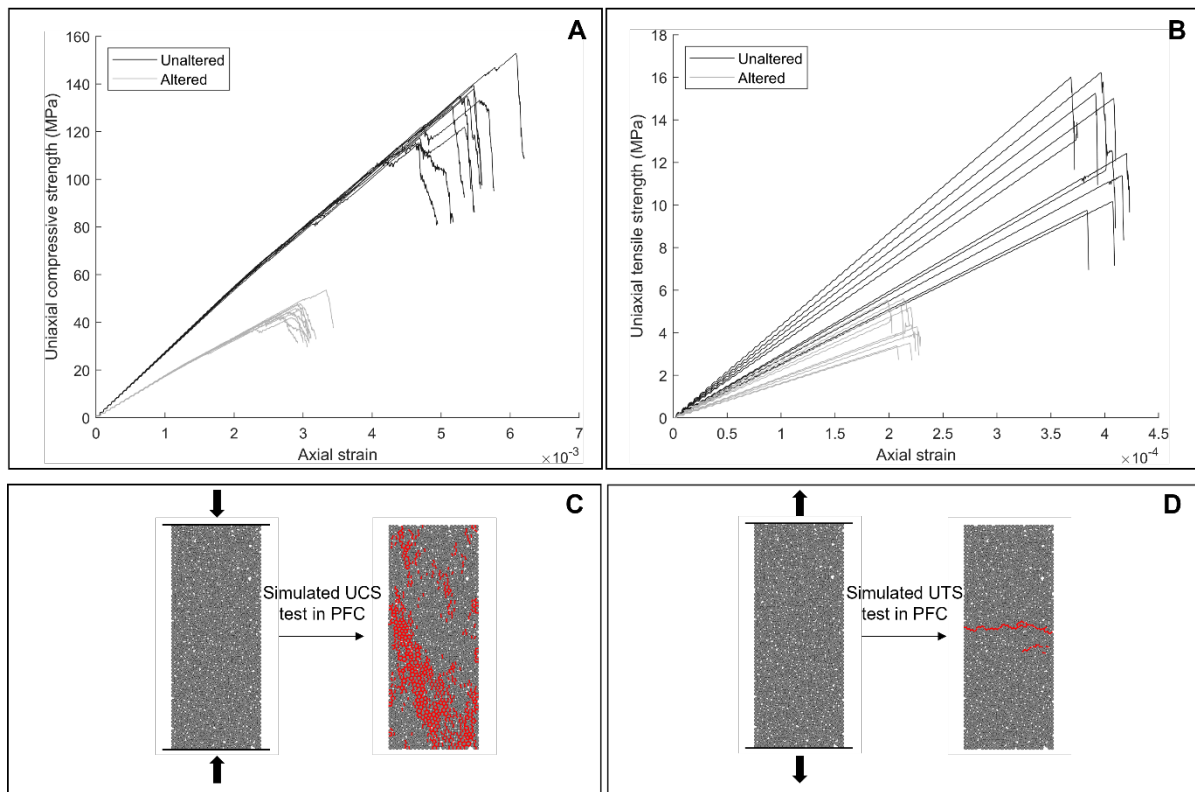

Supplementary Figure 2. Stress-strain curves from repeated laboratory tests in Particle Flow Code (PFC), calibrating the (a) uniaxial compressive strength (UCS) and (b) direct uniaxial tensile strength of  $40 \times 100$  mm samples with average values guided by the laboratory data in Figure 1. UCS tests are stopped when the stress reaches 70% of peak stress. For each of the altered and unaltered strength scenarios, 10 tests are run using a different initial seed number to give a different initial particle packing. Dark gray shows unaltered material properties ( $E = 26.9 \pm 0.3$  GPa,  $UCS = 131.6 \pm 11.5$  MPa, and  $UTS = 13.3 \pm 2.4$  MPa) while light gray shows altered material properties ( $E = 17.3 \pm 0.2$  GPa,  $UCS = 45.7 \pm 3.4$  MPa, and  $UTS = 17.3 \pm 0.2$ ). Panels (c) and (d) show model setup for laboratory tests, where particles are shown in grey. Red shows fractures (i.e., broken contacts) in each case, clearly showing failure in shear (c) and failure in tension (d).

Supplementary Table 1: model input parameters

| Micro-parameter            | Unaltered material | Altered material |
|----------------------------|--------------------|------------------|
| Flatjoint shear stiffness  | 8.0e9              | 8.0e9            |
| Flatjoint normal stiffness | 8.0e9              | 8.0e9            |
| Young's modulus            | 2.65e10 Pa         | 1.7e10 Pa        |
| Cohesion                   | 8.42e7 Pa          | 2.9e7 Pa         |
| Tensile strength           | 1.6e7 Pa           | 0.55e7 Pa        |
| Average particle radius    | 1.0±0.2 m          | 1.0±0.2 m        |
